# Supplementary material for: Plasma and Vitreous Metabolomics Profiling of Proliferative Diabetic Retinopathy
Source: PubMed Central journal article supplement — Invest Ophthalmol Vis Sci. 2022 Feb 8;63(2):17. doi: 10.1167/iovs.63.2.17 (PMC8842420; doi:10.1167/iovs.63.2.17), 2022-02-08
Supplement: iovs-63-2-17_s001.pdf [file iovs-63-2-17_s001.pdf]

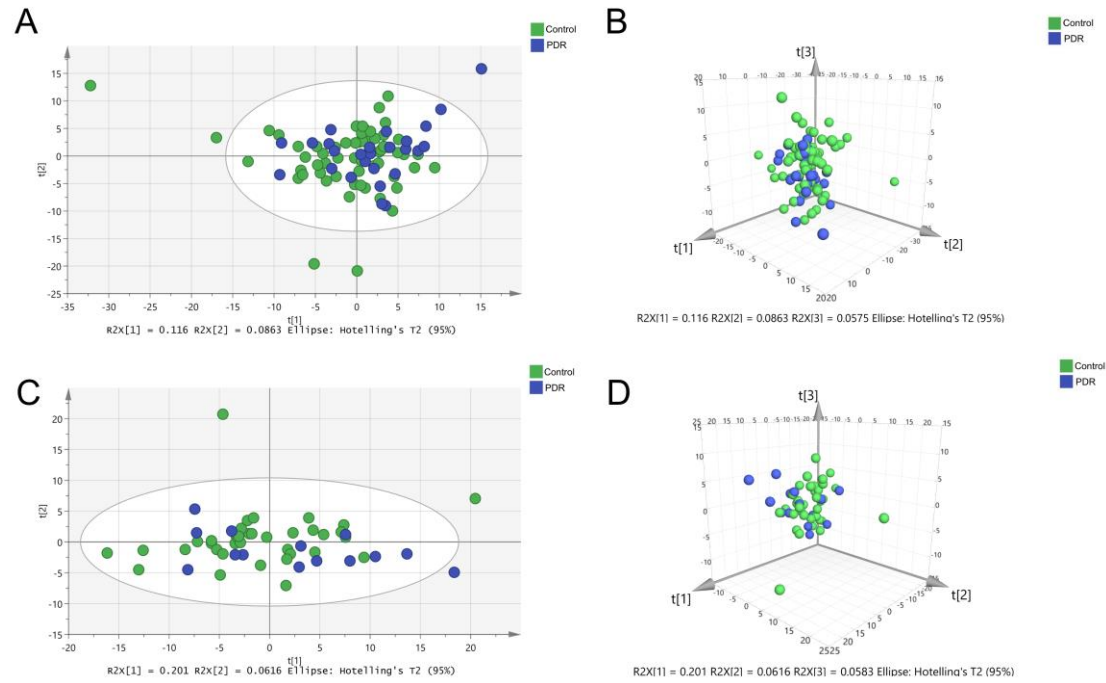

**Supplementary Figure 1** PCA analysis of plasma and vitreous metabolites

A) 2D score plot of PCA model for plasma metabolites B) 3D score plot of PCA mode for plasma metabolites C) 2D score plot of PCA model for vitreous metabolites D) 3D score plot of PCA mode for vitreous metabolites

**Supplementary Table 1** Differential metabolites from vitreous in PDR

| KEGG ID   | Metabolite Name                           | HMDB ID     | FC      | VIP   | p.adjusted (1) | p.adjusted (2) |
|-----------|-------------------------------------------|-------------|---------|-------|----------------|----------------|
| C00037    | Glycine                                   | HMDB0000123 | 0.164   | 1.656 | 0.000          | 0.000          |
| C00082    | L-Tyrosine                                | HMDB0000158 | 0.430   | 1.295 | 0.043          | 0.045          |
| C00106    | Uracil                                    | HMDB0000300 | 0.169   | 1.590 | 0.001          | 0.000          |
| C00109    | 2-Ketobutyric acid                        | HMDB0000005 | 0.190   | 1.596 | 0.001          | 0.001          |
| C00120    | Biotin                                    | HMDB0000030 | 6.332   | 1.344 | 0.009          | 0.015          |
| C00147    | Adenine                                   | HMDB0000034 | 0.265   | 1.146 | 0.011          | 0.008          |
| C00157    | PC (22:6(4Z,7Z,10Z,13Z,16Z,19Z)/18:1(9Z)) | HMDB0008729 | 0.249   | 1.048 | 0.026          | 0.023          |
| C00164    | Acetoacetic acid                          | HMDB0000060 | 0.187   | 1.534 | 0.002          | 0.002          |
| C00166    | Phenylpyruvic acid                        | HMDB0000205 | 0.427   | 1.253 | 0.046          | 0.053          |
| C00178    | Thymine                                   | HMDB0000262 | 0.084   | 1.868 | 0.000          | 0.000          |
| C00183    | L-Valine                                  | HMDB0000883 | 0.246   | 1.073 | 0.048          | 0.047          |
| C00246    | Butyric acid                              | HMDB0000039 | 0.197   | 1.551 | 0.004          | 0.006          |
| C00299    | Uridine                                   | HMDB0000296 | 0.217   | 1.506 | 0.001          | 0.001          |
| C00328    | L-Kynurenine                              | HMDB0000684 | 15.455  | 1.399 | 0.007          | 0.006          |
| C00341    | Geranyl 2-methylbutyrate                  | HMDB0032291 | 0.215   | 1.655 | 0.001          | 0.000          |
| C00366    | Uric acid                                 | HMDB0000289 | 13.692  | 1.344 | 0.012          | 0.011          |
| C00380    | Cytosine                                  | HMDB0000630 | 0.117   | 1.815 | 0.000          | 0.000          |
| C00408    | Pipecolic acid                            | HMDB0000070 | 0.036   | 1.538 | 0.000          | 0.000          |
| C00429    | Dihydrouracil                             | HMDB0000076 | 0.232   | 1.450 | 0.007          | 0.007          |
| C00475    | Cytidine                                  | HMDB0000089 | 0.083   | 1.909 | 0.000          | 0.000          |
| C00487    | Malonyl-Carnitin                          | HMDB0062496 | 3.206   | 1.424 | 0.015          | 0.006          |
| C00500_01 | Biliverdin IX                             | HMDB0304275 | 24.819  | 1.026 | 0.003          | 0.004          |
| C00500_02 | Biliverdin                                | HMDB0001008 | 16.937  | 1.242 | 0.002          | 0.002          |
| C00535    | Testosterone                              | HMDB0000234 | 27.863  | 1.656 | 0.001          | 0.000          |
| C00539    | Benzoic acid                              | HMDB0001870 | 0.215   | 1.668 | 0.001          | 0.001          |
| C00576    | Betaine aldehyde                          | HMDB0001252 | 0.280   | 1.387 | 0.011          | 0.018          |
| C00741    | Diacetyl                                  | HMDB0003407 | 0.253   | 1.303 | 0.028          | 0.046          |
| C00762    | Cortisone                                 | HMDB0002802 | 0.232   | 1.654 | 0.001          | 0.000          |
| C00777    | All-trans-retinoic acid                   | HMDB0001852 | 128.810 | 1.287 | 0.014          | 0.018          |

|           |                                   |             |         |       |       |       |
|-----------|-----------------------------------|-------------|---------|-------|-------|-------|
| C00831    | Pantetheine                       | HMDB0003426 | 13.888  | 1.341 | 0.004 | 0.004 |
| C00931    | Porphobilinogen                   | HMDB0000245 | 5.508   | 1.072 | 0.043 | 0.079 |
| C00942    | Cyclic GMP                        | HMDB0001314 | 0.127   | 1.361 | 0.001 | 0.000 |
| C00964    | (-)-trans-Carveol                 | HMDB0003450 | 0.355   | 1.318 | 0.014 | 0.023 |
| C01041    | Ascorbic acid                     | HMDB0000044 | 0.063   | 1.975 | 0.000 | 0.000 |
| C01042    | N-Acetyl-L-aspartic acid          | HMDB0000812 | 0.039   | 1.789 | 0.000 | 0.000 |
| C01045    | N-Formyl-L-glutamic acid          | HMDB0003470 | 0.041   | 1.745 | 0.000 | 0.000 |
| C01545    | Octanal                           | HMDB0001140 | 0.251   | 1.255 | 0.014 | 0.019 |
| C01770    | Gamma-Butyrolactone               | HMDB0000549 | 0.190   | 1.783 | 0.000 | 0.000 |
| C01771    | But-2-enoic acid                  | HMDB0010720 | 0.283   | 1.241 | 0.030 | 0.033 |
| C01879    | Pyroglutamic acid                 | HMDB0000267 | 0.272   | 1.377 | 0.003 | 0.005 |
| C01909    | Dethiobiotin                      | HMDB0003581 | 4.931   | 1.247 | 0.033 | 0.079 |
| C02043    | Indolelactic acid                 | HMDB0000671 | 2.847   | 1.146 | 0.030 | 0.001 |
| C02067    | Pseudouridine                     | HMDB0000767 | 0.292   | 1.263 | 0.002 | 0.000 |
| C02442    | N-Methyltyramine                  | HMDB0003633 | 0.321   | 1.237 | 0.007 | 0.013 |
| C02494    | 1-Methyladenosine                 | HMDB0003331 | 0.169   | 1.264 | 0.003 | 0.002 |
| C02505    | 2-Phenylacetamide                 | HMDB0010715 | 0.396   | 1.353 | 0.016 | 0.020 |
| C02678    | Dodecanedioic acid                | HMDB0000623 | 0.268   | 1.506 | 0.006 | 0.008 |
| C02710    | N-Acetylleucine                   | HMDB0011756 | 0.207   | 1.109 | 0.007 | 0.009 |
| C02838    | L-Octanoylcarnitine               | HMDB0000791 | 42.364  | 1.618 | 0.001 | 0.000 |
| C02892    | Thiamine acetic acid              |             | 0.159   | 1.695 | 0.001 | 0.000 |
| C02896    | Putrescine                        | HMDB0001414 | 0.249   | 1.234 | 0.006 | 0.004 |
| C03089    | 5-Methylthioribose                | HMDB0001087 | 8.824   | 1.291 | 0.004 | 0.012 |
| C03205    | Deoxycorticosterone               | HMDB0000016 | 476.970 | 1.686 | 0.001 | 0.001 |
| C03264    | D-Leucic acid                     | HMDB0000624 | 0.255   | 1.431 | 0.002 | 0.001 |
| C03299    | O-decanoyl-L-carnitine            | HMDB0062631 | 29.058  | 1.521 | 0.000 | 0.000 |
| C04148    | Alpha-N-Phenylacetyl-L-glutamine  | HMDB0006344 | 16.652  | 1.343 | 0.007 | 0.009 |
| C04217    | Geranylarnesyl diphosphate        | HMDB0012231 | 0.232   | 1.622 | 0.002 | 0.002 |
| C04221    | trans-1,2-Dihydrobenzene-1,2-diol | HMDB0001164 | 0.219   | 1.535 | 0.002 | 0.002 |
| C04230_01 | LysoPC (20:4(8Z,11Z,14Z,17Z))     | HMDB0010396 | 2.776   | 1.278 | 0.044 | 0.013 |
| C04230_02 | Oleoyl lysophosphatidylcholine    | HMDB0002815 | 3.170   | 1.191 | 0.048 | 0.016 |
| C05127    | 1-Methylhistamine                 | HMDB0000898 | 0.280   | 1.097 | 0.039 | 0.037 |

|        |                                    |             |        |       |       |       |
|--------|------------------------------------|-------------|--------|-------|-------|-------|
| C05131 | (1-Ribosylimidazole)-4-acetate     | HMDB0002331 | 0.085  | 1.773 | 0.000 | 0.000 |
| C05380 | Nicotinuric acid                   | HMDB0003269 | 17.518 | 1.231 | 0.015 | 0.014 |
| C05464 | Deoxycholic acid glycine conjugate | HMDB0000631 | 2.246  | 1.109 | 0.044 | 0.012 |
| C05578 | 5,6-Dihydroxyindole                | HMDB0004058 | 0.176  | 1.799 | 0.000 | 0.000 |
| C05607 | D-Phenyllactic acid                | HMDB0000563 | 0.225  | 1.307 | 0.022 | 0.018 |
| C05635 | 5-Hydroxyindoleacetic acid         | HMDB0000763 | 16.965 | 1.416 | 0.006 | 0.005 |
| C05793 | L-Urobilin                         | HMDB0004159 | 0.242  | 1.746 | 0.001 | 0.001 |
| C05853 | 2-Phenylethanol                    | HMDB0033944 | 0.262  | 1.251 | 0.003 | 0.001 |
| C05956 | Prostaglandin G2                   | HMDB0003235 | 0.234  | 1.686 | 0.001 | 0.000 |
| C06199 | Hordenine                          | HMDB0004366 | 0.218  | 1.006 | 0.013 | 0.013 |
| C06423 | Caprylic acid                      | HMDB0000482 | 0.195  | 1.698 | 0.001 | 0.001 |
| C07086 | Phenylacetic acid                  | HMDB0000209 | 0.226  | 1.640 | 0.001 | 0.001 |
| C07215 | 2-Methylbenzoic acid               | HMDB0002340 | 0.225  | 1.636 | 0.001 | 0.001 |
| C10490 | Safrole                            | HMDB0033591 | 0.219  | 1.676 | 0.002 | 0.002 |
| C11489 | N-Methylformamide                  | HMDB0001122 | 0.208  | 1.056 | 0.018 | 0.014 |
| C15497 | (24R)-Cholest-5-ene-3-beta,24-diol | HMDB0011643 | 12.992 | 1.303 | 0.016 | 0.036 |
| C15604 | 3-Methyl-2-butenal                 | HMDB0012157 | 0.210  | 1.313 | 0.006 | 0.009 |
| C17714 | Heptanoic acid                     | HMDB0000666 | 0.273  | 1.209 | 0.043 | 0.049 |

Note: “p.adjusted (1)” was the p-value obtained after adjusting for age. “p.adjusted (2)” was the p-value obtained after adjusting for biochemical parameters, including FBG and urea.

**Supplementary Table 2** Differential metabolites from plasma in PDR

| KEGG ID   | Metabolite Name                          | HMDB ID     | FC    | VIP   | p.adjusted (1) | p.adjusted (2) |
|-----------|------------------------------------------|-------------|-------|-------|----------------|----------------|
| C00078    | L-Tryptophan                             | HMDB0000929 | 0.472 | 2.571 | 0.006          | 0.008          |
| C00408    | Pipecolic acid                           | HMDB0000070 | 0.172 | 1.736 | 0.001          | 0.002          |
| C00637    | Indoleacetaldehyde                       | HMDB0001190 | 0.466 | 2.538 | 0.006          | 0.009          |
| C00643    | 5-Hydroxy-L-tryptophan                   | HMDB0000472 | 0.557 | 2.538 | 0.019          | 0.018          |
| C00831    | Pantetheine                              | HMDB0003426 | 1.938 | 1.349 | 0.021          | 0.019          |
| C01077    | Acetylhomoserine                         | HMDB0029423 | 6.391 | 2.392 | 0.002          | 0.001          |
| C01879    | Pyroglutamic acid                        | HMDB0000267 | 7.487 | 2.281 | 0.000          | 0.001          |
| C02291    | L-Cystathionine                          | HMDB0000099 | 3.661 | 1.888 | 0.011          | 0.031          |
| C02528    | Chenodeoxycholic acid                    | HMDB0000518 | 0.707 | 1.852 | 0.033          | 0.037          |
| C03089    | 5-Methylthioribose                       | HMDB0001087 | 9.001 | 2.466 | 0.030          | 0.084          |
| C03594    | 7 $\alpha$ -Hydroxycholesterol           | HMDB0001496 | 0.253 | 1.165 | 0.038          | 0.047          |
| C04148    | Alpha-N-Phenylacetyl-L-glutamine         | HMDB0006344 | 10.11 | 2.324 | 0.000          | 0.001          |
| C04230_01 | LysoPC (14:1(9Z))                        | HMDB0010380 | 0.287 | 1.389 | 0.038          | 0.010          |
| C04230_02 | LysoPC (16:1(9Z))                        | HMDB0010383 | 0.398 | 1.681 | 0.038          | 0.085          |
| C04230_03 | LysoPC (18:4(6Z,9Z,12Z,15Z))             | HMDB0010389 | 0.428 | 1.753 | 0.039          | 0.115          |
| C04230_04 | LysoPC (20:3(5Z,8Z,11Z))                 | HMDB0010393 | 0.412 | 1.945 | 0.019          | 0.065          |
| C04230_05 | LysoPC (20:3(8Z,11Z,14Z))                | HMDB0010394 | 0.352 | 1.835 | 0.030          | 0.096          |
| C04424    | S-(2-Methylpropionyl)-dihydrolipoamide-E | HMDB0006868 | 4.537 | 1.573 | 0.041          | 0.111          |
| C04483    | Deoxycholic acid                         | HMDB0000626 | 0.622 | 1.705 | 0.021          | 0.016          |
| C05598    | Phenylacetyl glycine                     | HMDB0000821 | 2.595 | 2.051 | 0.038          | 0.094          |
| C08313    | 3-Methylindole                           | HMDB0000466 | 0.503 | 2.534 | 0.009          | 0.012          |
| C15497    | (24R)-Cholest-5-ene-3-beta,24-diol       | HMDB0011643 | 6.172 | 2.338 | 0.038          | 0.029          |

Note: “p.adjusted (1)” was the p-value obtained after adjusting for age. “p.adjusted (2)” was the p-value obtained after adjusting for biochemical parameters, including FBG and urea.

**Supplementary Table 3** The correlation (P-value) between biochemical parameters and discriminatory metabolites from vitreous

| <b>Biochemical parameter</b>    | <b>C00408</b> | <b>C00831</b> | <b>C01879</b> | <b>C04148</b> | <b>C15497</b> |
|---------------------------------|---------------|---------------|---------------|---------------|---------------|
| Albumin                         | 0.630         | 0.087         | 0.005         | 0.029         | 0.338         |
| Albumin/ Globulin               | 0.933         | 0.091         | 0.552         | 0.233         | 0.879         |
| Aspartate transaminase (AST)    | 0.231         | 0.143         | 0.022         | 0.203         | 0.477         |
| AST/ ALT                        | 0.630         | 0.603         | 0.111         | 0.643         | 0.331         |
| Glucose                         | 0.012         | 0.480         | 0.321         | 0.800         | 0.724         |
| Chlorine                        | 0.091         | 0.737         | 0.089         | 0.667         | 0.970         |
| Creatinine                      | 0.548         | 0.149         | 0.024         | 0.095         | 0.179         |
| Globulin                        | 0.585         | 0.400         | 0.395         | 0.888         | 0.533         |
| Lactate dehydrogenase           | 0.937         | 0.637         | 0.990         | 0.932         | 0.017         |
| Mitochondrial AST               | 0.836         | 0.743         | 0.424         | 0.670         | 0.976         |
| Potassium                       | 0.381         | 0.229         | 0.953         | 0.249         | 0.374         |
| Retinol binding protein         | 0.321         | 0.660         | 0.481         | 0.357         | 0.062         |
| Alanine aminotransferase        | 0.223         | 0.066         | 0.001         | 0.079         | 0.282         |
| Alkaline phosphatase            | 0.486         | 0.174         | 0.955         | 0.127         | 0.095         |
| Bilirubin direct                | 0.401         | 0.047         | 0.839         | 0.023         | 0.039         |
| Bilirubin indirect              | 0.548         | 0.464         | 0.734         | 0.332         | 0.176         |
| Prealbumin                      | 0.696         | 0.586         | 0.121         | 0.856         | 0.441         |
| Total bile acids                | 0.955         | 0.768         | 0.418         | 0.724         | 0.385         |
| Bilirubin total                 | 0.884         | 0.215         | 0.858         | 0.129         | 0.083         |
| Total cholesterol determination | 0.582         | 0.578         | 0.680         | 0.709         | 0.541         |
| Triglycerides                   | 0.134         | 0.311         | 0.003         | 0.328         | 0.068         |

|                             |       |       |       |       |       |
|-----------------------------|-------|-------|-------|-------|-------|
| Uric acid                   | 0.949 | 0.825 | 0.047 | 0.725 | 0.560 |
| $\gamma$ -glutamine acylase | 0.200 | 0.189 | 0.188 | 0.398 | 0.127 |
| Sodium                      | 0.174 | 0.260 | 0.581 | 0.219 | 0.233 |
| Total protein               | 0.492 | 0.497 | 0.011 | 0.147 | 0.282 |
| Urea                        | 0.168 | 0.009 | 0.010 | 0.004 | 0.011 |

---

**Supplementary Table 4** The correlation (P-value) between biochemical parameters and discriminatory metabolites from plasma

|                                 | <b>C00408</b> | <b>C00831</b> | <b>C01879</b> | <b>C04148</b> | <b>C15497</b> |
|---------------------------------|---------------|---------------|---------------|---------------|---------------|
| Albumin                         | 0.267         | 0.048         | 0.003         | 0.002         | 0.001         |
| Albumin/ Globulin               | 0.085         | 0.015         | 0.090         | 0.090         | 0.302         |
| Aspartate transaminase (AST)    | 0.588         | 0.712         | 0.934         | 0.915         | 0.384         |
| AST/ ALT                        | 0.633         | 0.163         | 0.690         | 0.630         | 0.839         |
| Glucose                         | 0.008         | 0.196         | 0.170         | 0.143         | 0.368         |
| Chlorine                        | 0.958         | 0.680         | 0.634         | 0.566         | 0.267         |
| Creatinine                      | 0.040         | 0.509         | 0.000         | 0.000         | 0.000         |
| Globulin                        | 0.264         | 0.439         | 0.888         | 0.885         | 0.374         |
| Lactate dehydrogenase           | 0.611         | 0.424         | 0.416         | 0.449         | 0.008         |
| Mitochondrial AST               | 0.622         | 0.255         | 0.254         | 0.318         | 0.845         |
| Potassium                       | 0.419         | 0.130         | 0.024         | 0.014         | 0.225         |
| Retinol binding protein         | 0.129         | 0.625         | 0.010         | 0.003         | 0.005         |
| Alanine aminotransferase        | 0.446         | 0.512         | 0.880         | 0.911         | 0.240         |
| Alkaline phosphatase            | 0.403         | 0.699         | 0.438         | 0.694         | 0.266         |
| Bilirubin direct                | 0.040         | 0.059         | 0.103         | 0.064         | 0.046         |
| Bilirubin indirect              | 0.092         | 0.044         | 0.462         | 0.396         | 0.040         |
| Prealbumin                      | 0.068         | 0.898         | 0.032         | 0.020         | 0.091         |
| Total Bile Acids                | 0.272         | 0.050         | 0.724         | 0.662         | 0.075         |
| Bilirubin total                 | 0.047         | 0.029         | 0.260         | 0.198         | 0.025         |
| Total Cholesterol determination | 0.536         | 0.710         | 0.522         | 0.524         | 0.805         |
| Triglycerides                   | 0.919         | 0.009         | 0.999         | 0.714         | 0.724         |



|                             |       |       |       |       |       |
|-----------------------------|-------|-------|-------|-------|-------|
| Uric acid                   | 0.258 | 0.347 | 0.123 | 0.116 | 0.000 |
| $\gamma$ -glutamine acylase | 0.913 | 0.217 | 0.325 | 0.313 | 0.502 |
| Sodium                      | 0.804 | 0.639 | 0.922 | 0.855 | 0.570 |
| Total protein               | 0.913 | 0.381 | 0.040 | 0.033 | 0.007 |
| Urea                        | 0.026 | 0.104 | 0.000 | 0.000 | 0.000 |

---
